# Supplementary material for: Thermally Enhanced Spreading of Miscible Plumes in Porous Media
Source: MDPI journal article supplement (doi:10.3390/hydrology10040098), 2023-04-21
Supplement: s1 [file s1]

## SUPPORTING INFORMATION

### **Thermally Enhanced Spreading of Miscible Plumes in Porous Media**

Ryan G. Tigera, Whitney L. Benson, and David C. Mays

26 March 2023

This document contains the following figures showing the control and test for each experiment.

|                                           |   |
|-------------------------------------------|---|
| Figure S1. Results for experiment 1 ..... | 2 |
| Figure S2. Results for experiment 2 ..... | 3 |
| Figure S3. Results for experiment 3 ..... | 4 |
| Figure S4. Results for experiment 4 ..... | 5 |

| Volume              | Control                                                                             | Thermally enhanced                                                                   |
|---------------------|-------------------------------------------------------------------------------------|--------------------------------------------------------------------------------------|
| $V = 10 \text{ mL}$ | 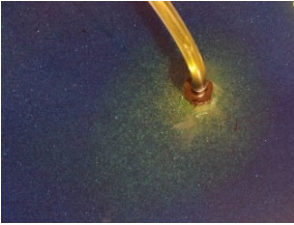   |    |
| $V = 20 \text{ mL}$ |    |    |
| $V = 30 \text{ mL}$ |    |    |
| $V = 40 \text{ mL}$ |   |   |
| $V = 50 \text{ mL}$ |  |  |
| $V = 60 \text{ mL}$ |  |  |

**Figure S1:** Results for experiment 1 with  $Pe = 320$  for cumulative injection volume  $10 \text{ mL} \leq V \leq 60 \text{ mL}$ . The isothermal control at left has mobility ratio  $R = 0$ . The thermally enhanced test at right has mobility ratio  $R = 1.2$ .

| Volume              | Control                                                                             | Thermally enhanced                                                                   |
|---------------------|-------------------------------------------------------------------------------------|--------------------------------------------------------------------------------------|
| $V = 10 \text{ mL}$ | 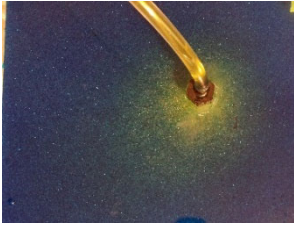   |    |
| $V = 20 \text{ mL}$ |    |    |
| $V = 30 \text{ mL}$ |    |    |
| $V = 40 \text{ mL}$ |   |   |
| $V = 50 \text{ mL}$ |  |  |
| $V = 60 \text{ mL}$ |  |  |

**Figure S2:** Results for experiment 2 with  $Pe = 160$  for cumulative injection volume  $10 \text{ mL} \leq V \leq 60 \text{ mL}$ . The isothermal control at left has mobility ratio  $R = 0$ . The thermally enhanced test at right has mobility ratio  $R = 1.2$ .



| Volume              | Control                                                                             | Thermally-enhanced                                                                   |
|---------------------|-------------------------------------------------------------------------------------|--------------------------------------------------------------------------------------|
| $V = 10 \text{ mL}$ | 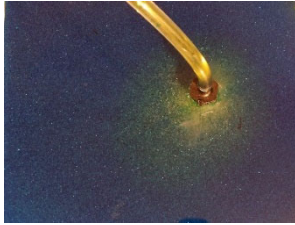   |    |
| $V = 20 \text{ mL}$ |    |    |
| $V = 30 \text{ mL}$ |    |    |
| $V = 40 \text{ mL}$ |   |   |
| $V = 50 \text{ mL}$ |  |  |
| $V = 60 \text{ mL}$ |  |  |

**Figure S3:** Results for experiment 3 with  $Pe = 80$  for cumulative injection volume  $10 \text{ mL} \leq V \leq 60 \text{ mL}$ . The isothermal control at left has mobility ratio  $R = 0$ . The thermally enhanced test at right has mobility ratio  $R = 1.2$ .

| Volume              | Control                                                                             | Thermally enhanced                                                                   |
|---------------------|-------------------------------------------------------------------------------------|--------------------------------------------------------------------------------------|
| $V = 10 \text{ mL}$ | 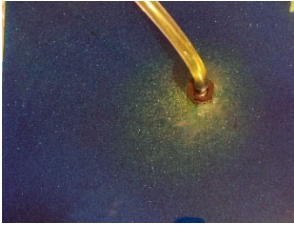   |    |
| $V = 20 \text{ mL}$ |    |    |
| $V = 30 \text{ mL}$ |    |    |
| $V = 40 \text{ mL}$ |   |   |
| $V = 50 \text{ mL}$ |  |  |
| $V = 60 \text{ mL}$ |  |  |

**Figure S4:** Results for experiment 4 with  $Pe = 40$  for cumulative injection volume  $10 \text{ mL} \leq V \leq 60 \text{ mL}$ . The isothermal control at left has mobility ratio  $R = 0$ . The thermally enhanced test at right has mobility ratio  $R = 1.2$ .
